# Supplementary material for: Bio-inspired design of NiFeP nanoparticles embedded in (N,P) co-doped carbon for boosting overall water splitting
Source: Royal Society of Chemistry journal article supplement (doi:10.1039/d3dt00583f), 2023-01-01
Supplement: d3dt00583f1.pdf [file d3dt00583f1.pdf]

## Bio-inspired design of NiFeP nanoparticles embedded in (N, P) co-doped carbon for boosting overall water splitting

Xiangrui Zhang, Xue-Rong Shi\*, Peijie Wang, Zhiyu Bao, Mengru Huang, Yanan Xu, Shusheng Xu\*

School of Materials Science and Engineering, Shanghai University of Engineering Science, Shanghai 201620, China

\*Corresponding authors.

Email: shixuer05@mailsucas.ac.cn; xushusheng@sues.edu.cn

### Content

|                                                                                                                                                                                                                                                                                                             |   |
|-------------------------------------------------------------------------------------------------------------------------------------------------------------------------------------------------------------------------------------------------------------------------------------------------------------|---|
| Chemical and Material .....                                                                                                                                                                                                                                                                                 | 3 |
| Electrochemical measurements .....                                                                                                                                                                                                                                                                          | 3 |
| Characterization .....                                                                                                                                                                                                                                                                                      | 4 |
| Calculation details .....                                                                                                                                                                                                                                                                                   | 4 |
| Figure S1. Synthesis of the NiFeP-C nanoparticles .....                                                                                                                                                                                                                                                     | 6 |
| Figure S2. XPS survey of Ni <sub>0.8</sub> Fe <sub>0.2</sub> P-C .....                                                                                                                                                                                                                                      | 6 |
| Figure S3. Pore size distribution profiles of Ni <sub>0.8</sub> Fe <sub>0.2</sub> P and Ni <sub>0.8</sub> Fe <sub>0.2</sub> P-C .....                                                                                                                                                                       | 6 |
| Figure S4. (a) Polarization curves of HER with marked $\eta_{10}$ values and (b) Tafel slopes of NiFe <sub>0.5</sub> P-C and Ni <sub>0.2</sub> Fe <sub>0.8</sub> P-C; and (c) Nyquist plots in 1.0 M KOH .....                                                                                              | 7 |
| Figure S5. Cyclic voltammograms (CV) curves in 1.0 M KOH for (a) NiP-C; (b) Ni <sub>0.8</sub> Fe <sub>0.2</sub> P-C; (c) FeP-C; (d) Ni <sub>0.8</sub> Fe <sub>0.2</sub> P at various scan rates (10, 30, 50, 70, 90, and 100 mV s <sup>-1</sup> ) under OER working condition in an alkaline solution. .... | 7 |
| Figure S6. ECSA-normalized LSV curves of HER in 1.0 M KOH .....                                                                                                                                                                                                                                             | 8 |
| Figure S7. (a) The polarization curves and (b) XRD patterns of the Ni <sub>0.8</sub> Fe <sub>0.2</sub> P-C before and after 100 h long-term stability (alkaline). (c, d) SEM images after the HER stability test in 1.0 M KOH solution .....                                                                | 8 |
| Figure S8. (a) Polarization curves of in alkaline simulated seawater; (b) Required overpotential ( $\eta$ ) at current densities of 10 mA cm <sup>-2</sup> ; (c) Corresponding Tafel plots; (d) Nyquist plots (inset: the equivalent circuit diagram) for HER. ....                                         | 9 |
| Figure S9. Polarization curves of OER in 1.0 M KOH of Ni <sub>0.5</sub> Fe <sub>0.5</sub> P-C and Ni <sub>0.2</sub> Fe <sub>0.8</sub> P-C .....                                                                                                                                                             | 9 |
| Figure S10. Cyclic voltammograms (CV) curves of (a) NiP-C; (b) Ni <sub>0.8</sub> Fe <sub>0.2</sub> P-C; (c)                                                                                                                                                                                                 |   |

|                                                                                                                                                                                                                                                                      |    |
|----------------------------------------------------------------------------------------------------------------------------------------------------------------------------------------------------------------------------------------------------------------------|----|
| FeP-C; (d) Ni <sub>0.8</sub> Fe <sub>0.2</sub> P at various scan rates (10-100 mV s <sup>-1</sup> ) under OER working condition in an alkaline solution. ....                                                                                                        | 10 |
| Figure S11. ECSA normalized LSV curves of OER in 1.0 M KOH. ....                                                                                                                                                                                                     | 10 |
| Figure S12. (a) XRD patterns of the Ni <sub>0.8</sub> Fe <sub>0.2</sub> P-C before and after OER stability test (alkaline). (b) SEM images after the OER stability test in 1.0 M KOH solution. ....                                                                  | 11 |
| Figure S13. Nyquist plots for OER in 1.0 M KOH. ....                                                                                                                                                                                                                 | 11 |
| Figure S14. (a) Polarization curves of in alkaline simulated seawater; (b) Required overpotential ( $\eta$ ) at current densities of 10 mA cm <sup>-2</sup> ; (c) Corresponding Tafel plots; (d) Nyquist plots (inset: the equivalent circuit diagram) for OER. .... | 12 |
| Figure S15. The photograph of overall water splitting powered by a battery with a nominal voltage of 1.5 V. ....                                                                                                                                                     | 12 |
| Figure S16. (a) H adsorption on the bridge site of Fe-Fe on FeP(121); (b) H adsorption on the hollow site of NiNiFe on Ni <sub>2</sub> P(111)-FeP(121). ....                                                                                                         | 13 |
| Table S1. Element contents of Ni <sub>0.8</sub> Fe <sub>0.2</sub> P-C based on XPS. ....                                                                                                                                                                             | 14 |
| Table S2. Metal contents of Ni <sub>0.8</sub> Fe <sub>0.2</sub> P-C determined by ICP-MS. ....                                                                                                                                                                       | 14 |
| Table S3. Comparison of electrocatalytic performances of this work with other TMP-based electrocatalysts for HER in alkaline media. ....                                                                                                                             | 15 |
| Table S4. Comparison of electrocatalytic performances of this work with other TMP-based electrocatalysts for OER in alkaline media. ....                                                                                                                             | 16 |
| Table S5. Comparison of electrocatalytic performances of this work with other TMP-based electrocatalysts for water splitting in alkaline media. ....                                                                                                                 | 17 |
| References.....                                                                                                                                                                                                                                                      | 18 |

## Chemical and Material

Ni(NO<sub>3</sub>)<sub>2</sub> · 6H<sub>2</sub>O (99%) and FeCl<sub>3</sub> · 6H<sub>2</sub>O (99%) were purchased from Shanghai Aladdin Biochemical Technology Co., Ltd. Carbon nanotubes (CNT), chitosan (CTS) and phytic acid (PA) (70%) were purchased from from Shanghai Titan. The other chemicals were analytical grade and used without further purification.

## Electrochemical measurements

Firstly, the glassy carbon electrode (GCE, 5 mm in diameter) was polished with 0.05 μm alumina slurry until a mirror-shaped surface was acquired. Then the electrode was washed alternately with ethanol and ultra-pure water, and finally dried at room temperature. The as-prepared sample (2 mg) and 1 mg Secco piano black was ultrasonically dispersed in the mixed solution of ethanol (390 μL) and Nafion (5 wt%, 10 μL) to obtain a homogeneous ink. Then, the GCE was modified with 10 μL ink and dried at room temperature before measurements.

Electrochemical performance of all electrodes was determined on an electrochemical working station (Chenhua CHI660E, Shanghai, China) by a three-electrode system. A carbon rod is used as the counter electrode. Hg/HgO (1 M KOH) is employed as the reference electrode. The modified GCE with catalysts (loading: 0.26 mg cm<sup>-2</sup>) was used as the working electrode. The electrolytes are 1 M KOH, and 1 M KOH + 0.5 M (NaCl). The LSV curves were measured with a scanning rate of 5 mV/s. Electrochemical impedance spectroscopy (EIS) measurements were performed at frequency from 100000 to 0.1 Hz. Electrochemical experiments were carried out with iR compensation (95%). The Tafel slope *b* was estimated using  $\eta = a + b \log|j|$ . The potentials in this work were adjusted with reversible hydrogen electrode (RHE):

$$E(\text{RHE}) = E(\text{Hg/HgO}) + 0.098 + 0.059 \times \text{pH}$$

To prepare Pt/C or RuO<sub>2</sub> electrode, 2 mg catalyst samples (Pt/C or RuO<sub>2</sub> powder) and 1 mg Secco piano black were added into 390 μL ethanol solution, ultrasonically dispersed for 30 min, then mixed with 10 μL Nafion, and ultrasonically dispersed for another 20 min to form the ink. The 10 μL of the mixed ink was dropped onto GCE and dried in air.

## Characterization

The morphology of the materials is investigated using a scanning electron microscope (SEM, Ultra-55, Carl Zeiss, Germany) with a 3 kV accelerating voltage and secondary electron measurement mode. The morphology and element distribution in Ni<sub>0.8</sub>Fe<sub>0.2</sub>P-C were further explored using a transmission electron microscope (TEM, FEI Talos F200X G2, America) with a 200 kV accelerating voltage where the elemental distribution was recorded by a dark field mode. Powder X-ray diffraction (XRD, Rigaku Ultima IV diffractometer, Japan) patterns were analyzed to determine the crystal structure and phase composition of the materials using a Cu K $\alpha$  ( $\lambda = 0.154$  nm) radiation source generated at 30 kV and 25 mA, listed as Bragg measurement, in a  $2\theta$  scanning range of 10-90 ° at a scanning speed of 5 ° min<sup>-1</sup>. The detector is a Detex Ultra one-dimensional semiconductor high-speed array detector. The Jade software is used to analyze data. X-ray photoelectron spectroscopy (XPS, Thermo Scientific K-Alpha+, Thermo) in the chamber is recorded with a non-monochromatic Al K $\alpha$  X-ray source ( $h\nu = 1486.6$  eV) at 12 kV and filament current of 6 mA. The analyzer is operated at a constant pass energy of 50 eV. The binding energy is corrected based on the binding energy of C1s (284.8 eV). Relevant porosity data were obtained using the nitrogen adsorption/desorption isotherm measurement on a JW-BK122W equipment at 77 K. Inductively coupled plasma mass spectrometry (ICP-MS, Agilent-7700) was used to determine the Fe/Ni ratio of Ni<sub>0.8</sub>Fe<sub>0.2</sub>P-C.

## Calculation details

The cutoff energy for the plane wave basis set was fixed at 400 eV. Force converged criterion for geometry optimization is 0.03 eV/Å. A Monkhorst-Pack grid of 3 × 3 × 1 and 1 × 1 × 1 were employed for the structural optimization of the FeP(121) and (carbon sheet-) TMPs composite model, respectively. For electronic properties calculations of FeP(121)-Ni<sub>2</sub>P(111)/NPC, a 4 × 2 × 1 k-point sampling was used. Vacuum layers of 20 Å were used. The top half of the total metal-P layers and adsorbates are allowed to relax during the geometry optimization. For the composite model, only the 12 atoms in the bottom layer is fixed to keep the shape without collapse and all the other atoms are allowed to relax during the optimization. For the

N-graphene, 3N model including two pyridine N, one pyrrole N, and one C defect model is built due to the vital role of the pyrrole N and C defects.

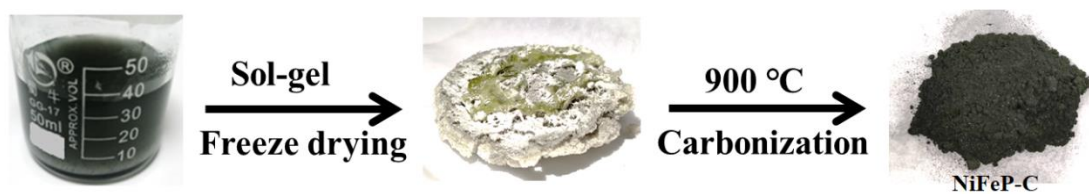

**Figure S1.** Synthesis of the NiFeP-C nanoparticles.

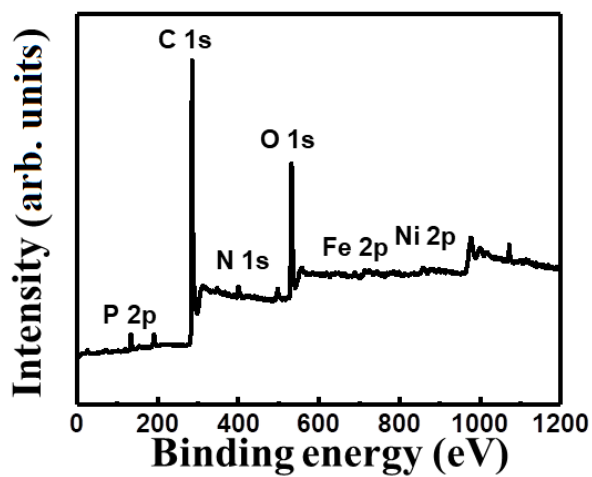

**Figure S2.** XPS survey of  $\text{Ni}_{0.8}\text{Fe}_{0.2}\text{P-C}$ .

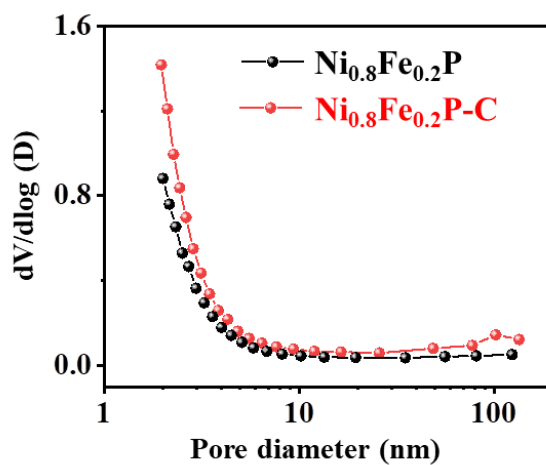

**Figure S3.** Pore size distribution profiles of  $\text{Ni}_{0.8}\text{Fe}_{0.2}\text{P}$  and  $\text{Ni}_{0.8}\text{Fe}_{0.2}\text{P-C}$ .

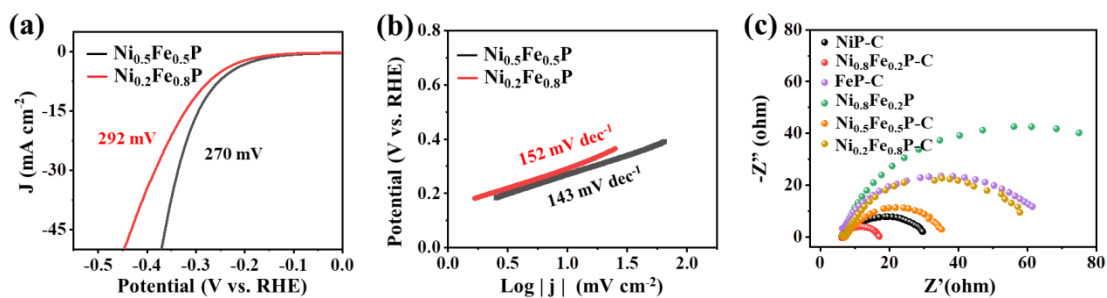

**Figure S4.** (a) Polarization curves of HER with marked  $\eta_{10}$  values and (b) Tafel slopes of  $\text{NiFe}_{0.5}\text{P-C}$  and  $\text{Ni}_{0.2}\text{Fe}_{0.8}\text{P-C}$ ; and (c) Nyquist plots in 1.0 M KOH.

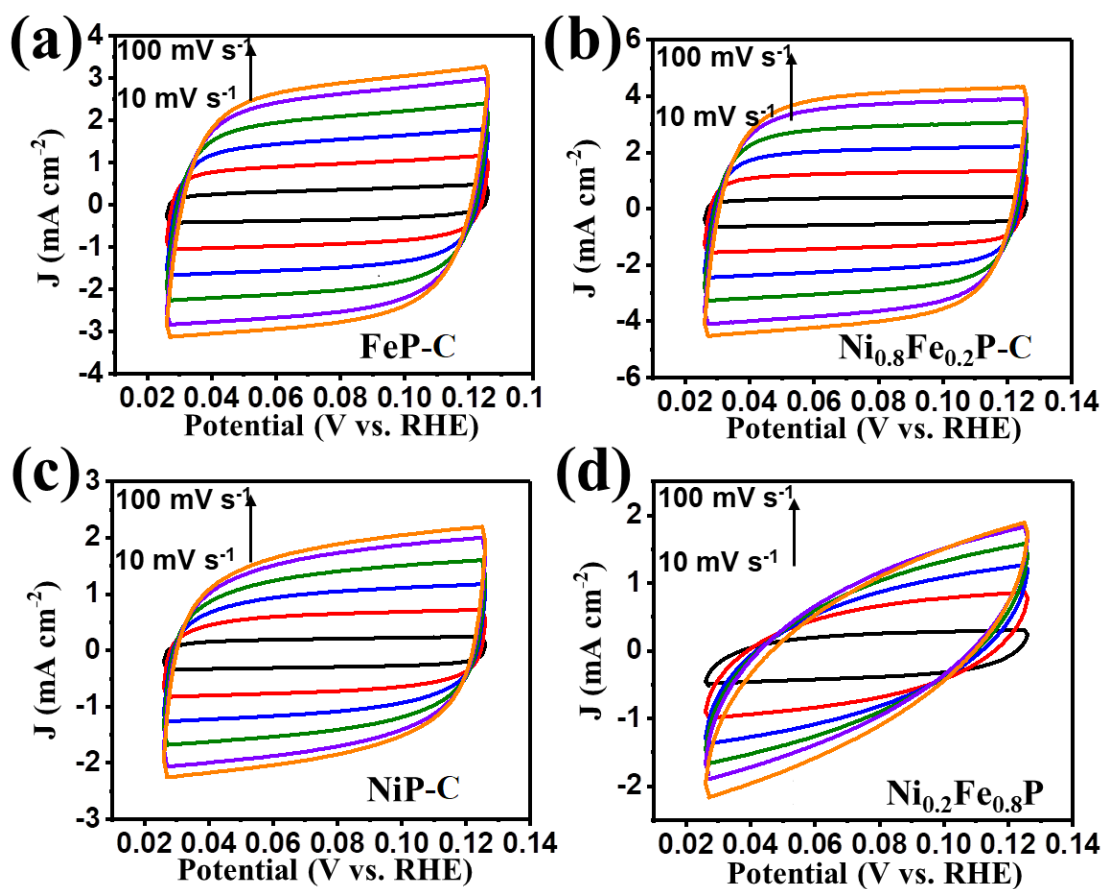

**Figure S5.** Cyclic voltammograms (CV) curves in 1.0 M KOH for (a)  $\text{NiP-C}$ ; (b)  $\text{Ni}_{0.8}\text{Fe}_{0.2}\text{P-C}$ ; (c)  $\text{FeP-C}$ ; (d)  $\text{Ni}_{0.8}\text{Fe}_{0.2}\text{P}$  at various scan rates (10, 30, 50, 70, 90, and  $100 \text{ mV s}^{-1}$ ) under OER working condition in an alkaline solution.

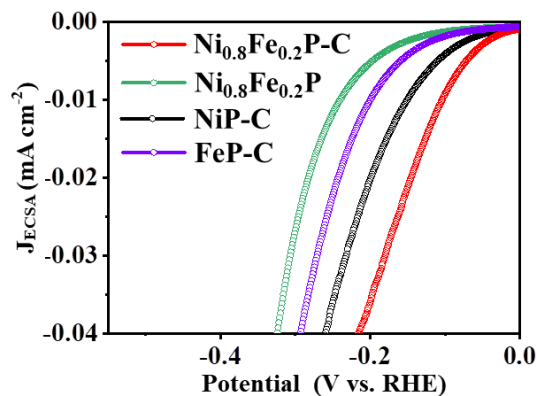

**Figure S6.** ECSA-normalized LSV curves of HER in 1.0 M KOH.

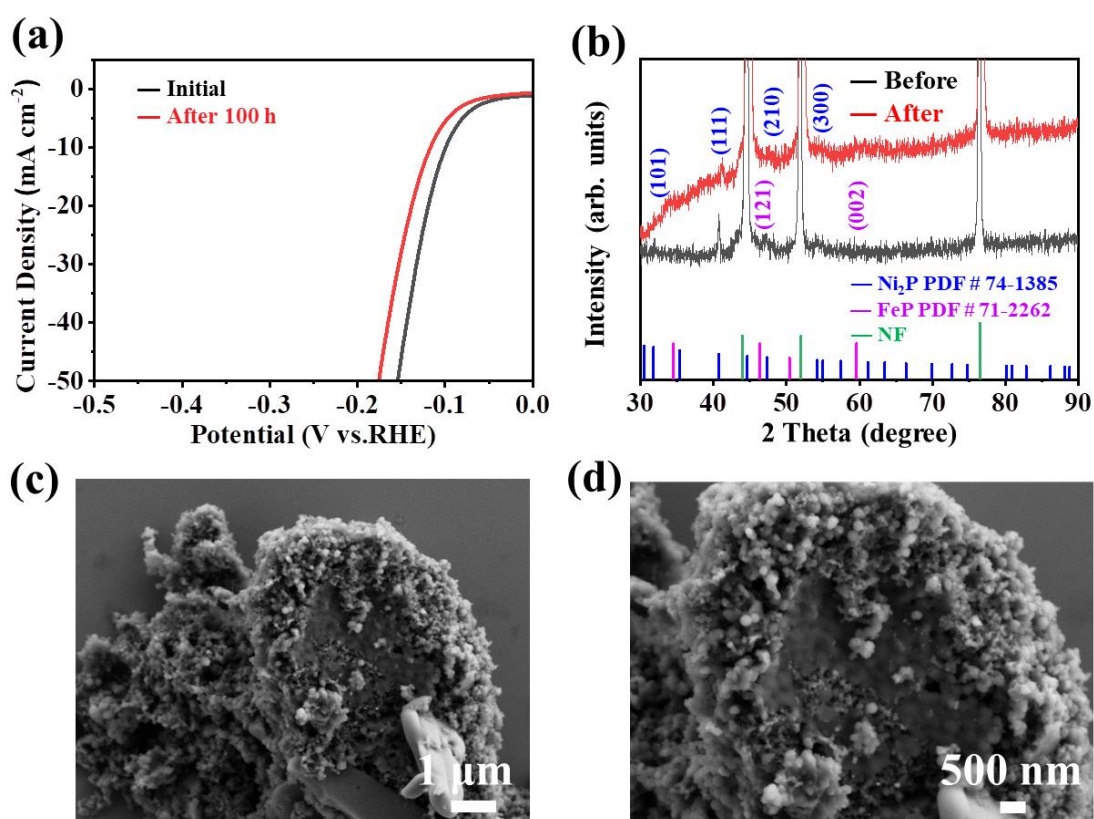

**Figure S7.** (a) The polarization curves and (b) XRD patterns of the Ni<sub>0.8</sub>Fe<sub>0.2</sub>P-C before and after 100 h long-term stability (alkaline). (c, d) SEM images after the HER stability test in 1.0 M KOH solution.



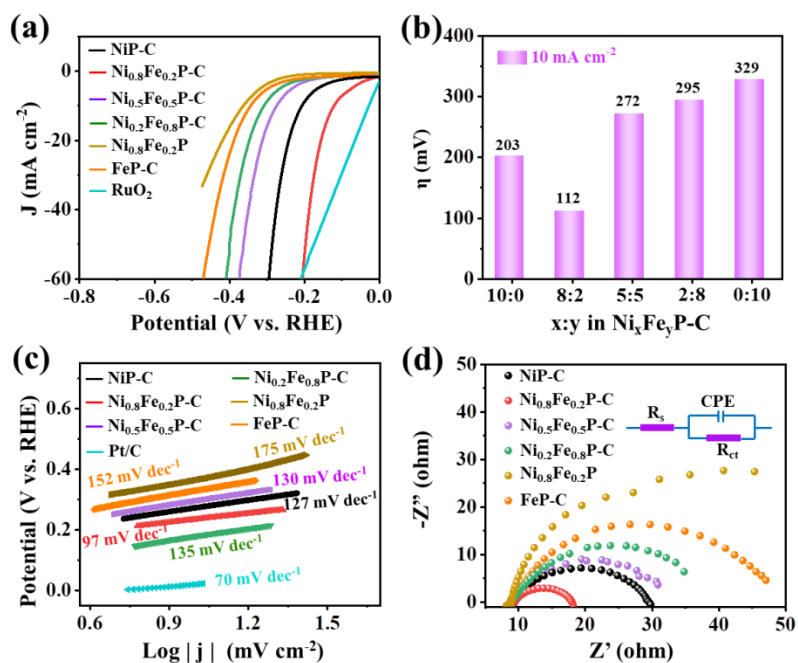

**Figure S8.** (a) Polarization curves of in alkaline simulated seawater; (b) Required overpotential ( $\eta$ ) at current densities of  $10 \text{ mA cm}^{-2}$ ; (c) Corresponding Tafel plots; (d) Nyquist plots (inset: the equivalent circuit diagram) for HER.

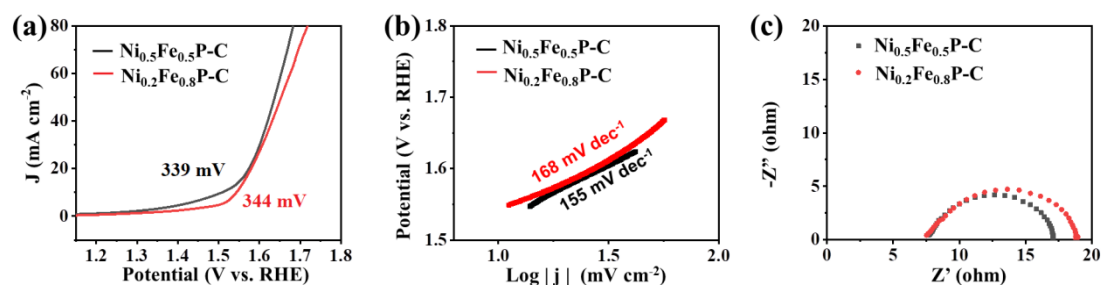

**Figure S9.** Polarization curves of OER in 1.0 M KOH of  $\text{Ni}_{0.5}\text{Fe}_{0.5}\text{P-C}$  and  $\text{Ni}_{0.2}\text{Fe}_{0.8}\text{P-C}$ .

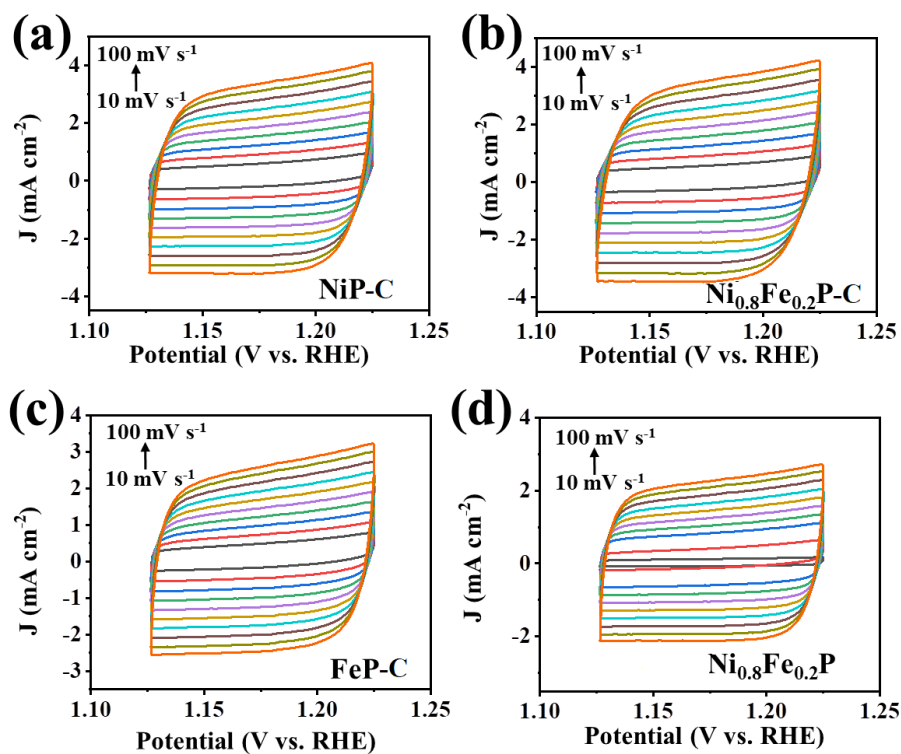

**Figure S10.** Cyclic voltammograms (CV) curves of (a) NiP-C; (b) Ni<sub>0.8</sub>Fe<sub>0.2</sub>P-C; (c) FeP-C; (d) Ni<sub>0.8</sub>Fe<sub>0.2</sub>P at various scan rates (10-100 mV s<sup>-1</sup>) under OER working condition in an alkaline solution.

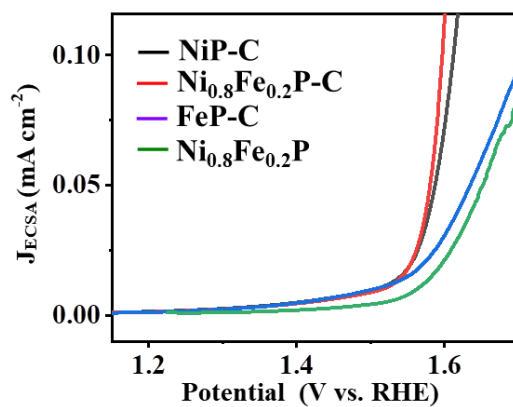

**Figure S11.** ECSA normalized LSV curves of OER in 1.0 M KOH.

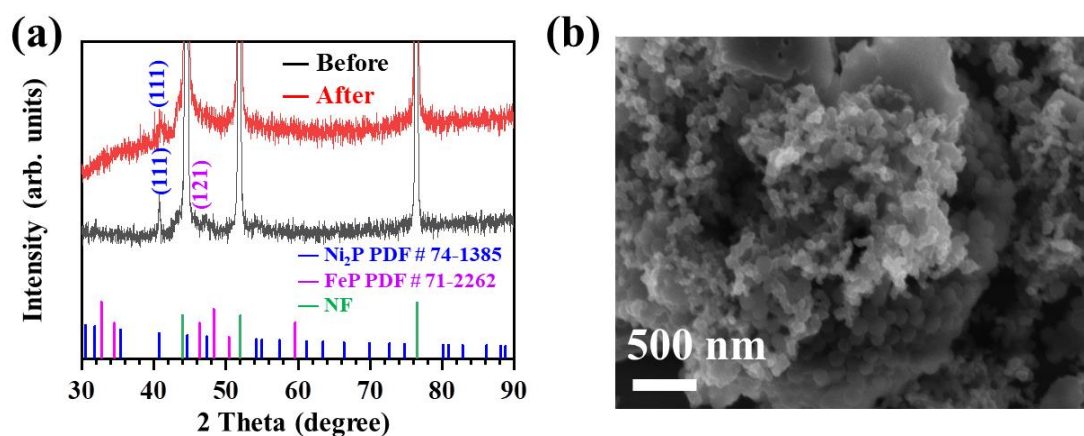

**Figure S12.** (a) XRD patterns of the  $\text{Ni}_{0.8}\text{Fe}_{0.2}\text{P-C/NF}$  before and after OER stability test (alkaline). (b) SEM images after the OER stability test in 1.0 M KOH solution.

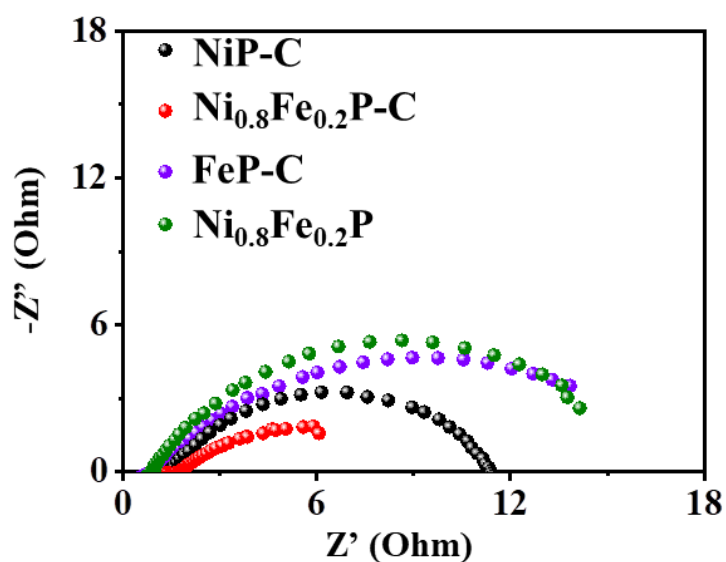

**Figure S13.** Nyquist plots for OER in 1.0 M KOH.

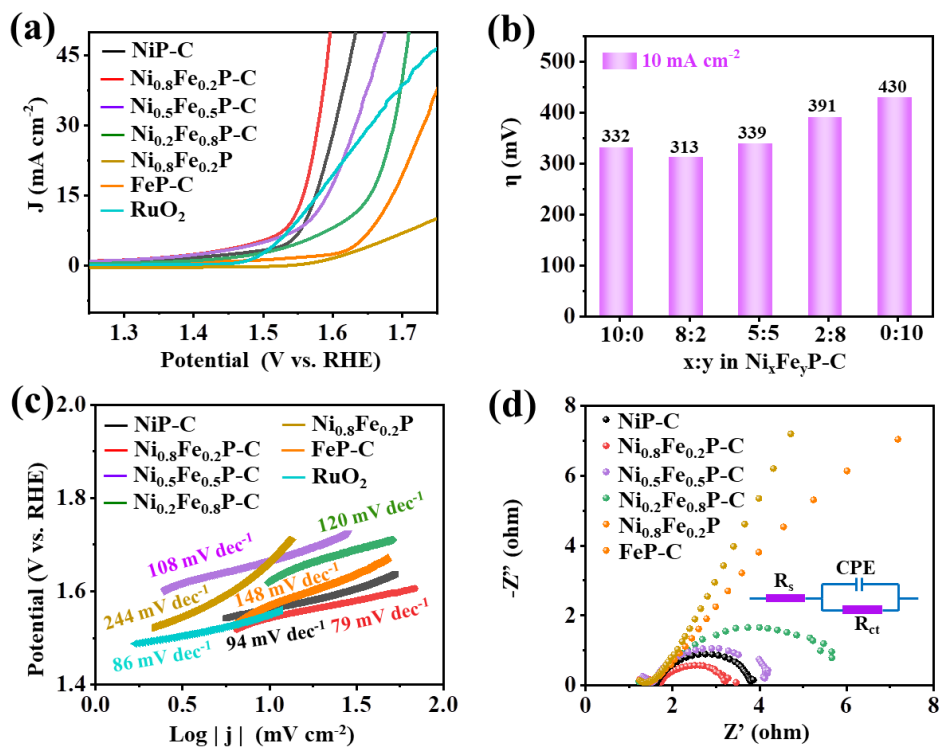

**Figure S14.** (a) Polarization curves of in alkaline simulated seawater; (b) Required overpotential ( $\eta$ ) at current densities of 10 mA cm<sup>-2</sup>; (c) Corresponding Tafel plots; (d) Nyquist plots (inset: the equivalent circuit diagram) for OER.

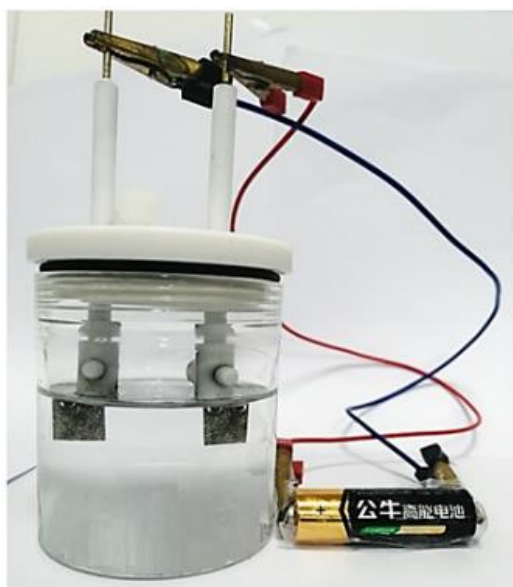

**Figure S15.** The photograph of overall water splitting powered by a battery with a nominal voltage of 1.5 V.

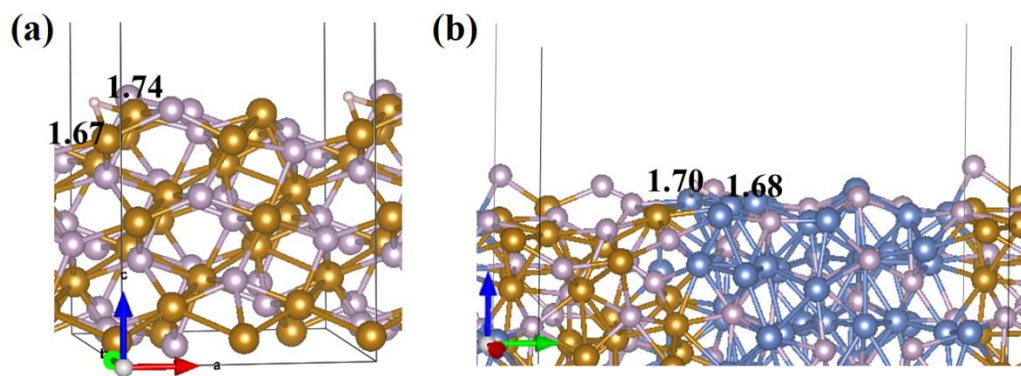

**Figure S16.** (a) H adsorption on the bridge site of Fe-Fe on FeP(121); (b) H adsorption on the hollow site of NiNiFe on Ni<sub>2</sub>P(111)-FeP(121).

**Table S1.** Element contents of Ni<sub>0.8</sub>Fe<sub>0.2</sub>P-C based on XPS.

| Sample                                  | Ni (at%) | Fe (at%) | P (at%) | C (at%) | O (at%) | N (at%) |
|-----------------------------------------|----------|----------|---------|---------|---------|---------|
| Ni <sub>0.8</sub> Fe <sub>0.2</sub> P-C | 2.32     | 1.38     | 5.47    | 73.81   | 13.94   | 3.08    |

**Table S2.** Metal contents of Ni<sub>0.8</sub>Fe<sub>0.2</sub>P-C determined by ICP-MS.

| Sample                                  | Ni (wt%) | Fe (wt%) | Atomic ratio Fe:Ni |
|-----------------------------------------|----------|----------|--------------------|
| Ni <sub>0.8</sub> Fe <sub>0.2</sub> P-C | 12.29    | 2.82     | 7: 29              |

**Table S3.** Comparison of electrocatalytic performances of this work with other TMP-based electrocatalysts for HER in alkaline media.

| Electrode materials                        | Current density (j)    | Overpotential ( $\eta$ ) at (j) | Tafel slope              | Stability hours | Electrolyte | Ref.         |
|--------------------------------------------|------------------------|---------------------------------|--------------------------|-----------------|-------------|--------------|
| Ni-Co-P/NF                                 | 10 mA cm <sup>-2</sup> | 85 mV                           | 46 mV dec <sup>-1</sup>  | 25 h            | 1.0 M KOH   | <sup>1</sup> |
| FeP/C4-11                                  | 10 mA cm <sup>-2</sup> | 95 mV                           | 58 mV dec <sup>-1</sup>  | 24 h            | 1.0 M KOH   | <sup>2</sup> |
| NiFeP                                      | 10 mA cm <sup>-2</sup> | 98 mV                           | 99 mV dec <sup>-1</sup>  | 30 h            | 1.0 M KOH   | <sup>3</sup> |
| FeP                                        | 10 mA cm <sup>-2</sup> | 116 mV                          | 57 mV dec <sup>-1</sup>  | --              | 1.0 M KOH   | <sup>4</sup> |
| MnCoP/NiP/NF                               | 10 mA cm <sup>-2</sup> | 119 mV                          | 61 mV dec <sup>-1</sup>  | 25 h            | 1.0 M KOH   | <sup>5</sup> |
| NiFe/CNTs-900                              | 10 mA cm <sup>-2</sup> | 149 mV                          | 87 mV dec <sup>-1</sup>  | 12 h            | 1.0 M KOH   | <sup>6</sup> |
| NiFeP/NFF                                  | 10 mA cm <sup>-2</sup> | 155 mV                          | 68 mV dec <sup>-1</sup>  | 12 h            | 1.0 M KOH   | <sup>7</sup> |
| NiFeP@N-CS                                 | 10 mA cm <sup>-2</sup> | 186 mV                          | 112 mV dec <sup>-1</sup> | 1000 h          | 1.0 M KOH   | <sup>8</sup> |
| Ni <sub>0.8</sub> Fe <sub>0.2</sub> P-C/NF | 10 mA cm <sup>-2</sup> | 45 mV                           | 133 mV dec <sup>-1</sup> | 100 h           | 1.0 M KOH   | This work    |

**Table S4.** Comparison of electrocatalytic performances of this work with other TMP-based electrocatalysts for OER in alkaline media.

| Electrode materials                                                | Current density (j)    | Overpotential ( $\eta$ ) at (j) | Tafel slope              | Stability hours | Electrolyte | Ref.      |
|--------------------------------------------------------------------|------------------------|---------------------------------|--------------------------|-----------------|-------------|-----------|
| NiFeP@C                                                            | 10 mA cm <sup>-2</sup> | 260 mV                          | 39 mV dec <sup>-1</sup>  | 20 h            | 1.0 M KOH   | 9         |
| CoFeP-NC                                                           | 10 mA cm <sup>-2</sup> | 283 mV                          | 69 mV dec <sup>-1</sup>  | 10 h            | 1.0 M KOH   | 10        |
| 2.5Fe-NiCoP/PBA HNCs                                               | 10 mA cm <sup>-2</sup> | 290 mV                          | 70 mV dec <sup>-1</sup>  | 40 h            | 1.0 M KOH   | 11        |
| Fe-doped NiO <sub>x</sub> nanosheets                               | 10 mA cm <sup>-2</sup> | 310 mV                          | 49 mV dec <sup>-1</sup>  | 18 h            | 1.0 M KOH   | 12        |
| NiFe@CN-G                                                          | 10 mA cm <sup>-2</sup> | 320 mV                          | 41 mV dec <sup>-1</sup>  | 4 h             | 1.0 M KOH   | 13        |
| Porous Ni <sub>2</sub> P                                           | 10 mA cm <sup>-2</sup> | 320 mV                          | 105 mV dec <sup>-1</sup> | 10 h            | 1.0 M KOH   | 14        |
| CoFeP                                                              | 10 mA cm <sup>-2</sup> | 350 mV                          | 59 mV dec <sup>-1</sup>  | --              | 1.0 M KOH   | 15        |
| Fe <sub>0.5</sub> Ni <sub>0.5</sub> Co <sub>2</sub> O <sub>4</sub> | 10 mA cm <sup>-2</sup> | 350 mV                          | 27 mV dec <sup>-1</sup>  | 10 h            | 1.0 M KOH   | 16        |
| Ni <sub>0.8</sub> Fe <sub>0.2</sub> P-C/NF                         | 10 mA cm <sup>-2</sup> | 242 mV                          | 76 mV dec <sup>-1</sup>  | 48 h            | 1.0 M KOH   | This work |



**Table S5.** Comparison of electrocatalytic performances of this work with other TMP-based electrocatalysts for water splitting in alkaline media.

| Electrode materials                        | Current density (j)    | Overpotential ( $\eta$ ) at (j) | Stability hours | Electrolyte | Ref.      |
|--------------------------------------------|------------------------|---------------------------------|-----------------|-------------|-----------|
| NiFe(1:1)P-MOF                             | 10 mA cm <sup>-2</sup> | 1.54 V                          | 20 h            | 1.0 M KOH   | 17        |
| MOF CoFeP                                  | 10 mA cm <sup>-2</sup> | 1.55 V                          | 30 h            | 1.0 M KOH   | 18        |
| CoFeP NS@NCNF                              | 10 mA cm <sup>-2</sup> | 1.59 V                          | 15 h            | 1.0 M KOH   | 19        |
| CoFeP-NC                                   | 10 mA cm <sup>-2</sup> | 1.62 V                          | 20 h            | 1.0 M KOH   | 10        |
| NiP/NF                                     | 10 mA cm <sup>-2</sup> | 1.63 V                          | 24 h            | 1.0 M KOH   | 20        |
| NiFeP@N-CS                                 | 10 mA cm <sup>-2</sup> | 1.63 V                          | 24 h            | 1.0 M KOH   | 8         |
| NiFeO <sub>x</sub> /NiFeP/NF               | 10 mA cm <sup>-2</sup> | 1.65 V                          | 15 h            | 1.0 M KOH   | 21        |
| Ni <sub>5</sub> P <sub>4</sub>             | 10 mA cm <sup>-2</sup> | 1.70 V                          | 20 h            | 1.0 M KOH   | 22        |
| Ni <sub>0.8</sub> Fe <sub>0.2</sub> P-C/NF | 10 mA cm <sup>-2</sup> | 1.56 V                          | 100 h           | 1.0 M KOH   | This work |

## References

- 1 C. Yu, F. Xu, L. Luo, H. S. Abbo, S. J. J. Titinchi, P. K. Shen, P. Tsiakaras and S. Yin, *Electrochim. Acta*, 2019, **317**, 191–198.
- 2 M. H. Suliman, T. N. Baroud, M. N. Siddiqui, M. Qamar and E. P. Giannelis, *Int. J. Hydrogen Energy*, 2021, **46**, 8507–8518.
- 3 D. W. Wang, Y. Di Zhu, S. Lei, S. M. Chen, Z. G. Gu and J. Zhang, *J. Solid State Chem.*, 2021, **293**, 121779.
- 4 M. Guo, Y. Qu, C. Yuan and S. Chen, *Int. J. Hydrogen Energy*, 2019, **44**, 24197–24208.
- 5 Y. Du, W. Wang, H. Zhao, Y. Liu, S. Li, L. Wang and B. Liu, *Chem. - A Eur. J.*, 2021, **27**, 3536–3541.
- 6 H. Li, Y. He, T. He, H. Shi, H. Yu, X. Ma, Y. Zhang, C. Zhang and S. Wang, *J. Solid State Chem.*, 2020, **289**, 121498.
- 7 X. Yu, X. He, R. Li and X. Gou, *Dalt. Trans.*, 2021, **50**, 8102–8110.
- 8 J. Hei, G. Xu, B. Wei, L. Zhang, H. Ding and D. Liu, *Appl. Surf. Sci.*, 2021, **549**, 149297.
- 9 Q. Kang, M. Li, J. Shi, Q. Lu and F. Gao, *ACS Appl. Mater. Interfaces*, 2020, **12**, 19447–19456.
- 10 C. Zhao, F. Wei, H. Lv, D. Zhao, N. Wang, L. Li, N. Li and X. Wang, *Materials.*, 2021, **14**, 14061473.
- 11 D. Li, C. Liu, W. Ma, S. Xu, Y. Lu, W. Wei and J. Zhu, *Electrochim. Acta*, 2021, **367**, 137492.
- 12 G. Wu, W. Chen, X. Zheng, D. He, Y. Luo, X. Wang, J. Yang, Y. Wu, W. Yan, Z. Zhuang, X. Hong and Y. Li, *Nano Energy*, 2017, **38**, 167–174.
- 13 A. C. Deng, K. Wu, J. Scott, S. Zhu, R. Amal and D. Wang, *ChemElectroChem*, 2018, **5**, 732–736.
- 14 Q. Wang, Z. Liu, H. Zhao, H. Huang, H. Jiao and Y. Du, *J. Mater. Chem. A*, 2018, **6**, 18720–18727.
- 15 Y. Du, H. Qu, Y. Liu, Y. Han, L. Wang and B. Dong, *Appl. Surf. Sci.*, 2019, **465**, 816–823.
- 16 K. Yan, X. Shang, Z. Li, B. Dong, X. Li, W. Gao, J. Chi, Y. Chai and C. Liu, *Appl. Surf. Sci.*, 2017, **416**, 371–378.
- 17 X. Xu, T. Wang, C. Zhao, Z. Huang, M. Zheng, R. Jia and Y. Liu, *Microporous Mesoporous Mater.*, 2020, **312**, 110760.
- 18 A. Muthurasu, G. P. Ojha, M. Lee and H. Y. Kim, *J. Phys. Chem. C*, 2020, **124**, 14465–14476.
- 19 B. Wei, G. Xu, J. Hei, L. Zhang, T. Huang and Q. Wang, *J. Colloid Interface Sci.*, 2021, **602**, 619–626.
- 20 J. Ren, Z. Hu, C. Chen, Y. Liu and Z. Yuan, *J. Energy Chem.*, 2017, **26**, 1196–1202.
- 21 C. Zhang, N. Gong, C. Ding, Y. Li, W. Peng, G. Zhang, F. Zhang and X. Fan, *Int. J. Hydrogen Energy*, 2019, **44**, 26118–26127.
- 22 M. Ledendecker, S. K. Calderón, C. Papp, H. Steinrück, M. Antonietti and M.

Shalom, *Angew. Chemie*, 2015, **54**, 12361–12365.
